# Supplementary material
Source: publisher figshare collection journal article supplement (https://acs.figshare.com/ndownloader/files/4045345)
Supplement: Supplementary file 1 [file 4045345]

# Supplemental information

## Tailored electronic structure and optical properties of conjugated systems through aggregates and dipole-dipole interactions

Young Il Park, Cheng-Yu Kuo, Yong-Shin Park, Jennifer S. Martinez, Olena Postupna, Andriy Zhugayevych, Seungho Kim, Jongwook Park, Sergei Tretiak, Hsing-Lin Wang

### Contents

1.  $^1\text{H}$  and  $^{13}\text{C}$  NMR data of PPVO derivatives
2. Conformational analysis

Table S1. List of  $\lambda_{max}$ , for UV-Vis absorption, photoluminescence, Stokes shift and quantum yield of all six PPVOs.

Table S2: List of all media used in the theoretical calculations, their abbreviations, and values of static and optical dielectric constants.

Figure S1. FT-IR spectra of all six PPVOs and NMR spectrum of H-PPVO

Figure S2. UV-Vis spectra (a) and photoluminescence spectra (b) of six PPVOs in chloroform solution.

Figure S3, Determination of quantum yields of six PPVOs in toluene solution.

Figure S4. Alternative conformation accessible at 300K.

Figure S5. XRD spectra of PPOV powders.

Figure S6. PL spectra of  $\text{NO}_2$ -PPVO in  $10^{-2}$  and  $10^{-3}\text{M}$  chloroform solution under front face geometry.

# 1. $^1\text{H}$ and $^{13}\text{C}$ NMR data of PPVO derivatives

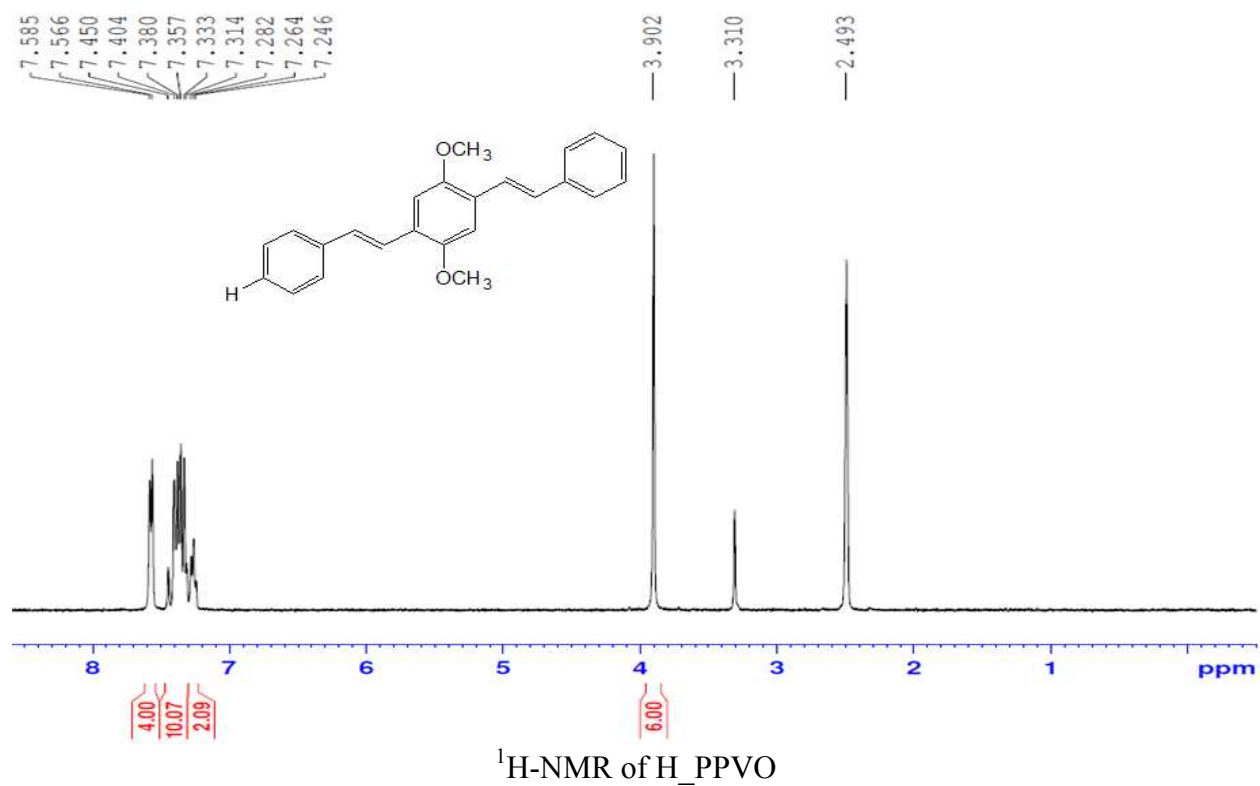

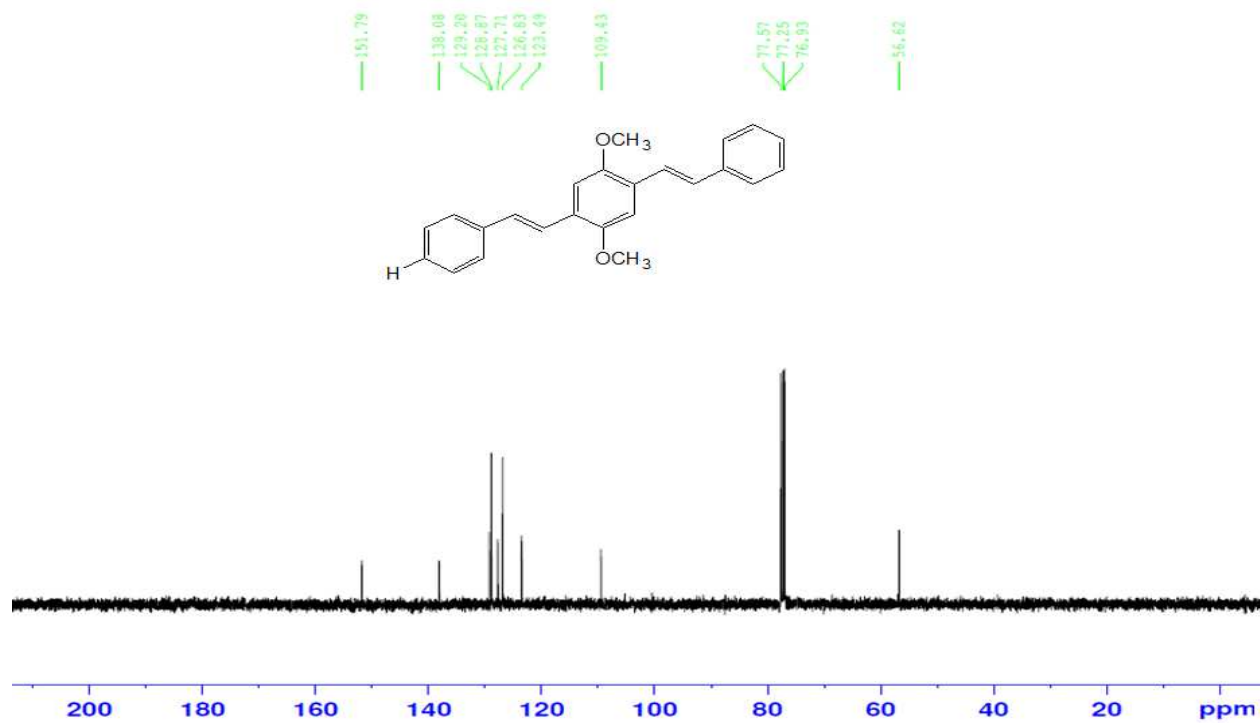

$^{13}\text{C-NMR}$  of H\_PPVO

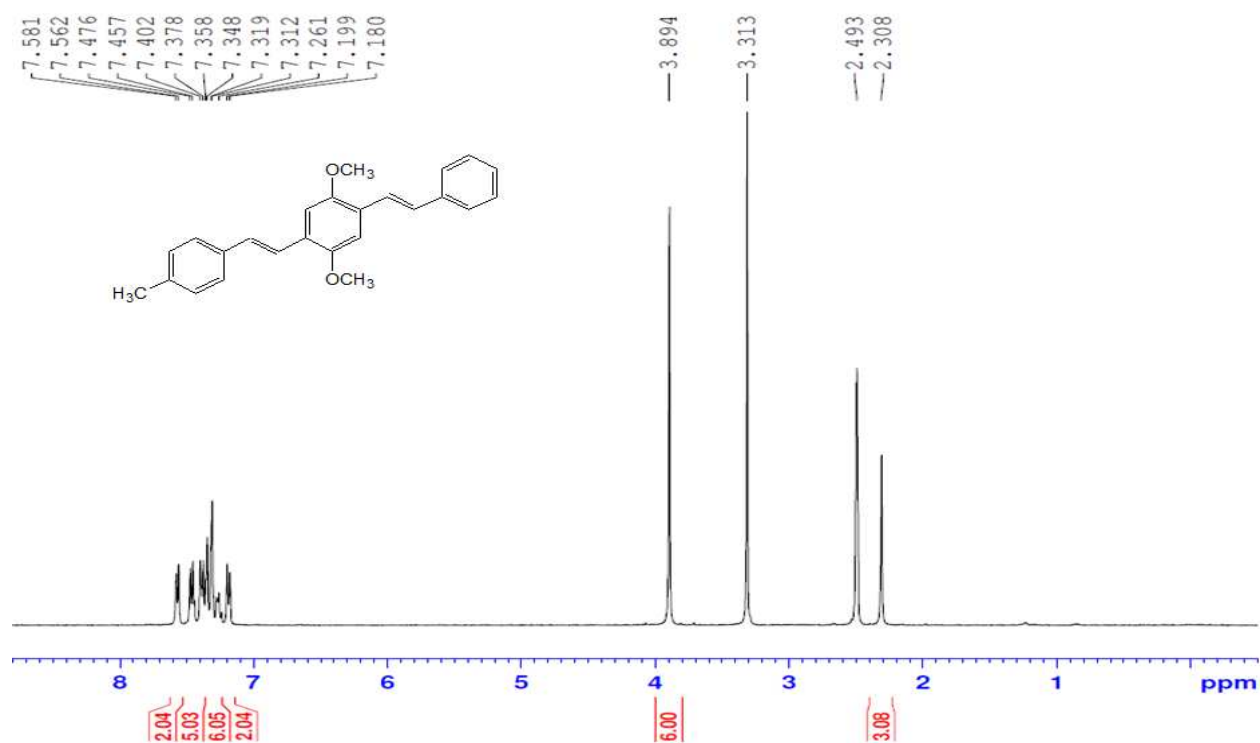

$^1\text{H-NMR}$  of CH<sub>3</sub>\_PPVO

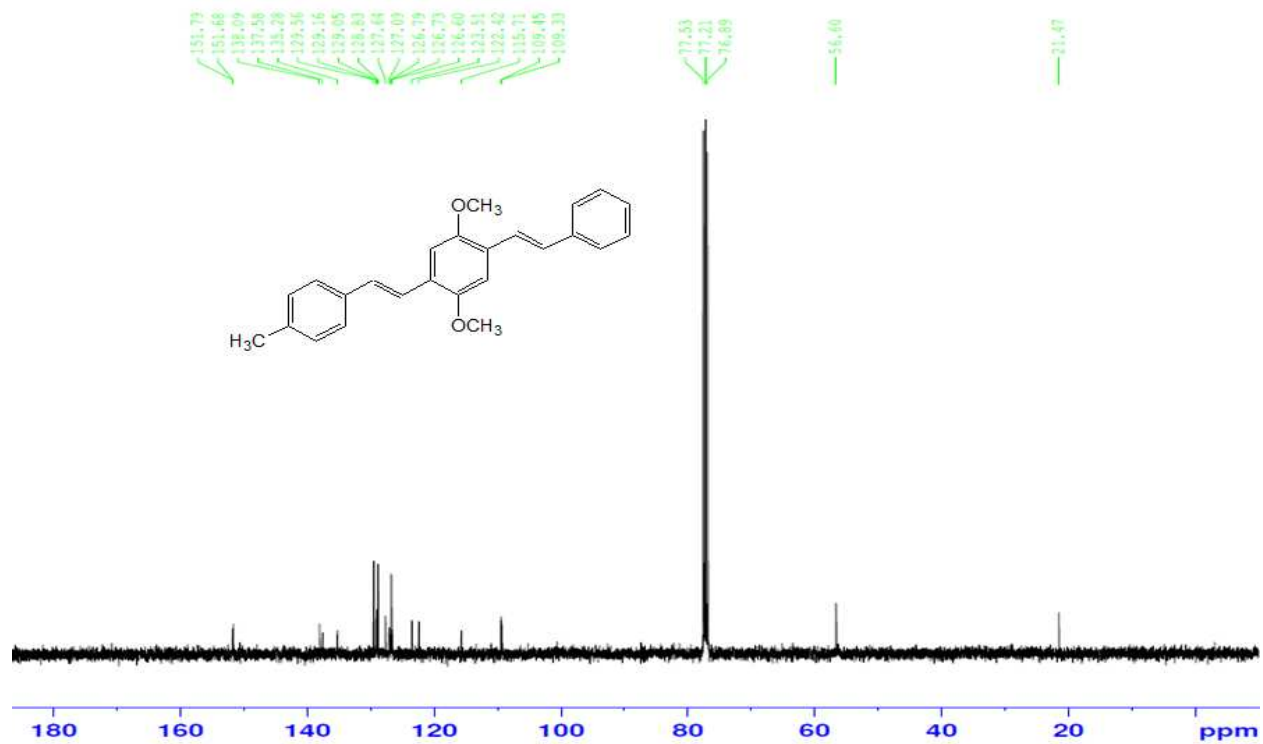

<sup>13</sup>C-NMR of CH<sub>3</sub>\_PPVO

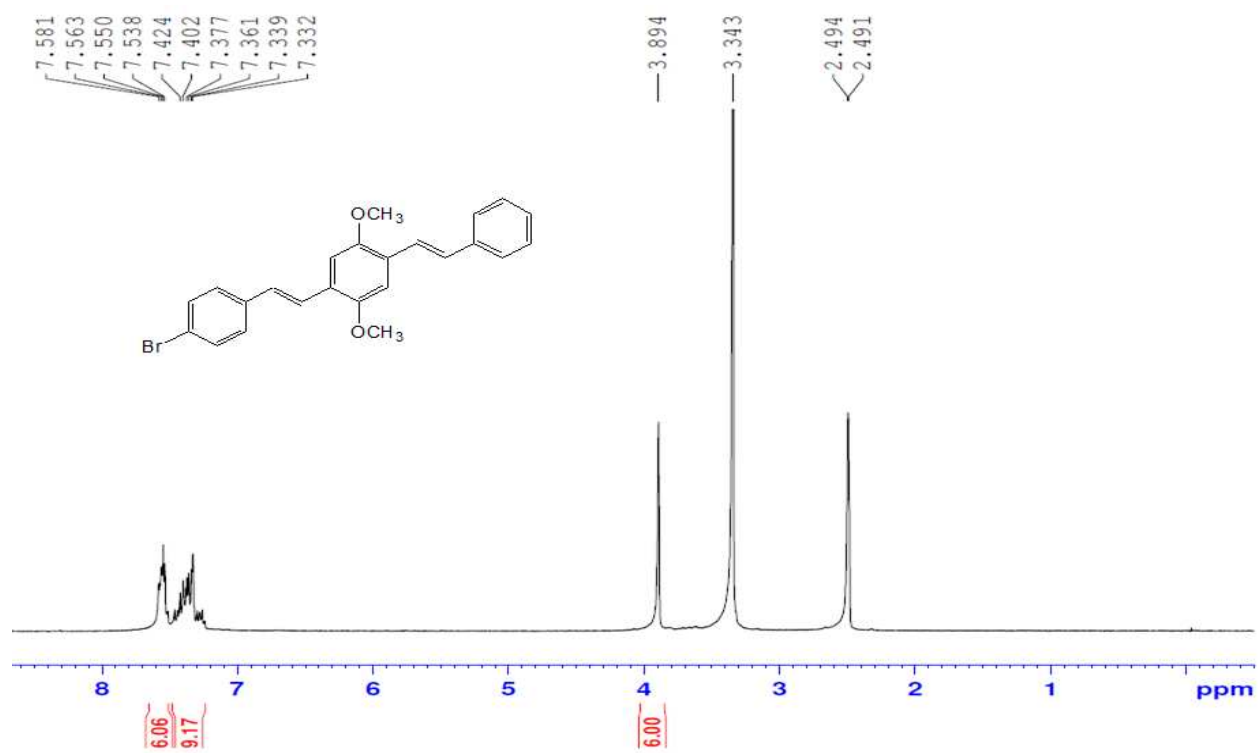

<sup>1</sup>H-NMR of Br\_PPVO

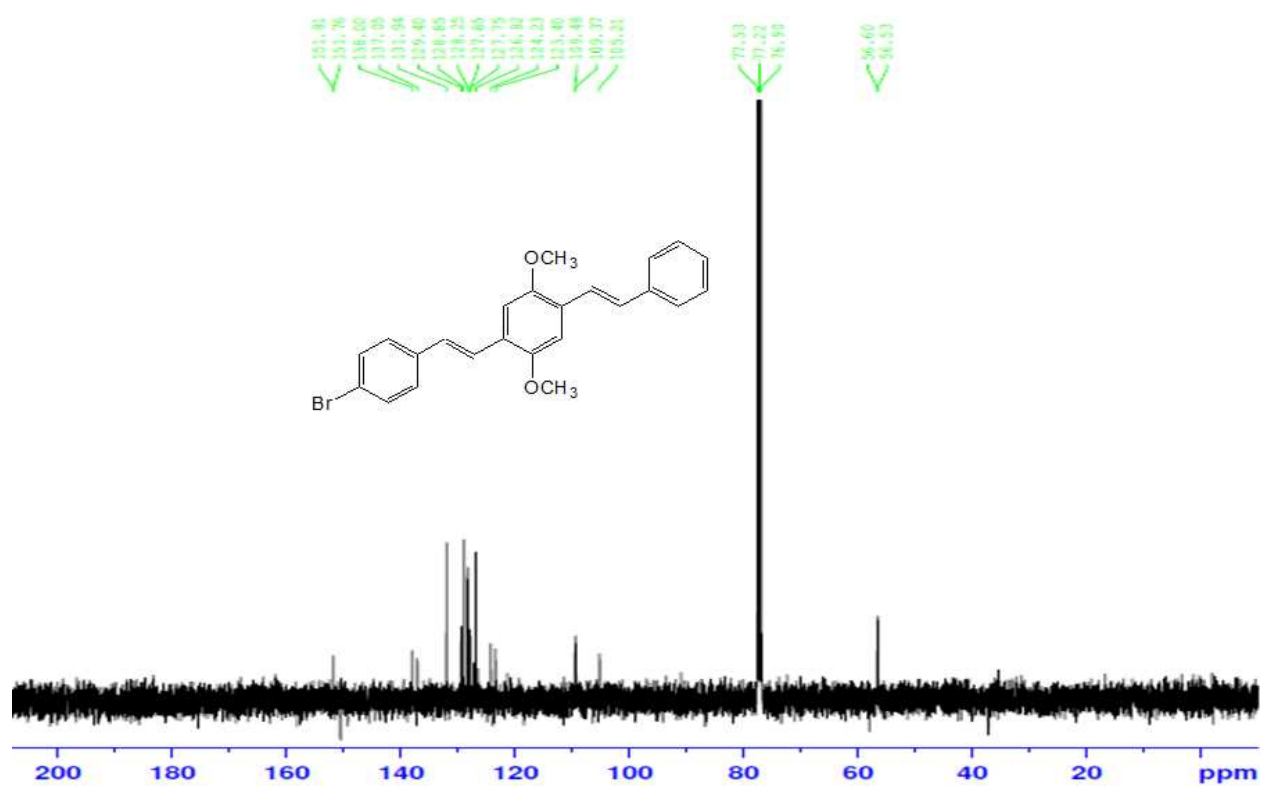

$^{13}\text{C}$ -NMR of Br\_PPVO

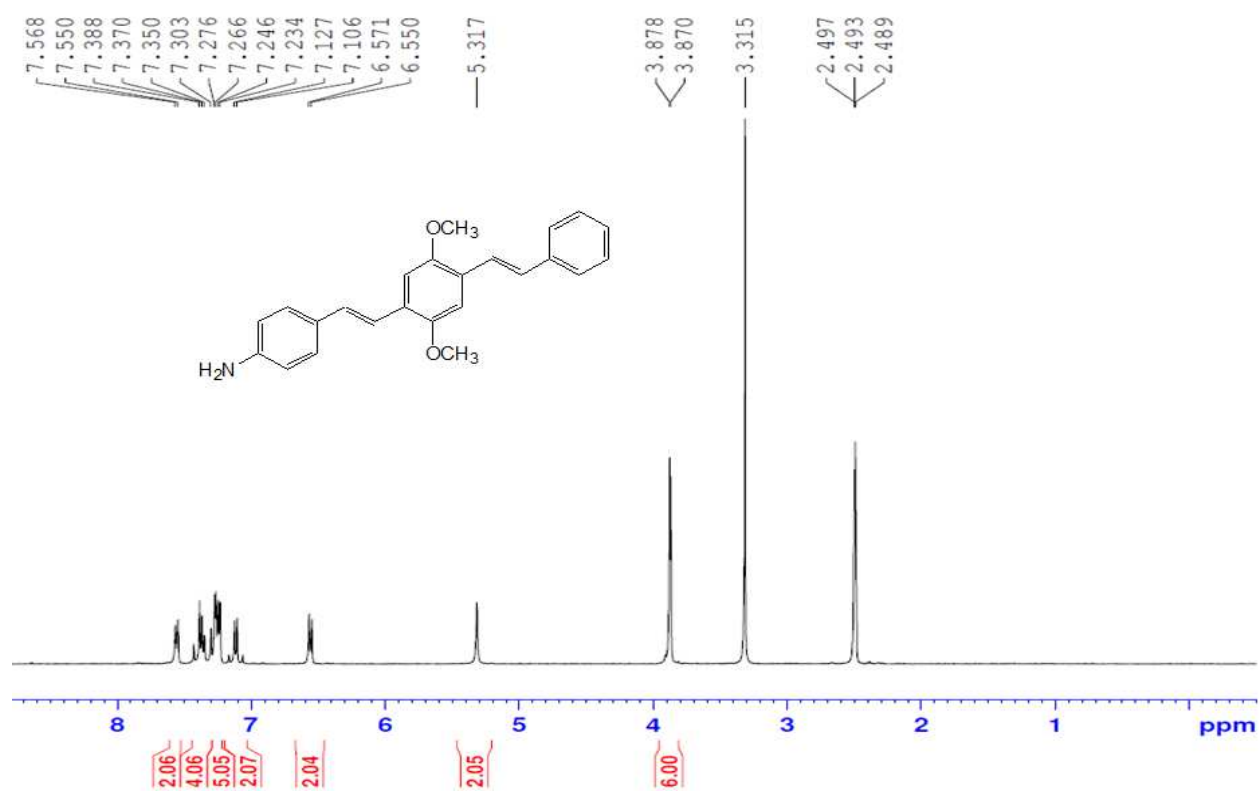

<sup>1</sup>H-NMR of NH<sub>2</sub>\_PPVO

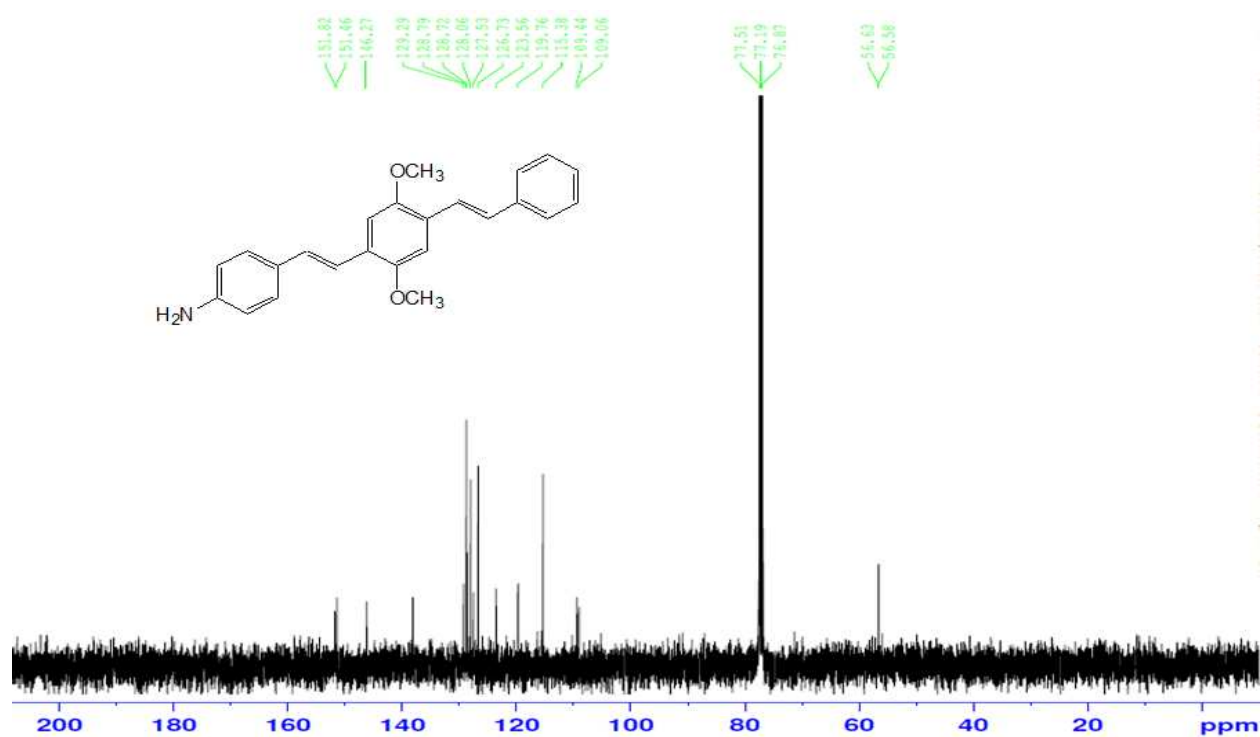

<sup>13</sup>C-NMR of NH<sub>2</sub>\_PPVO

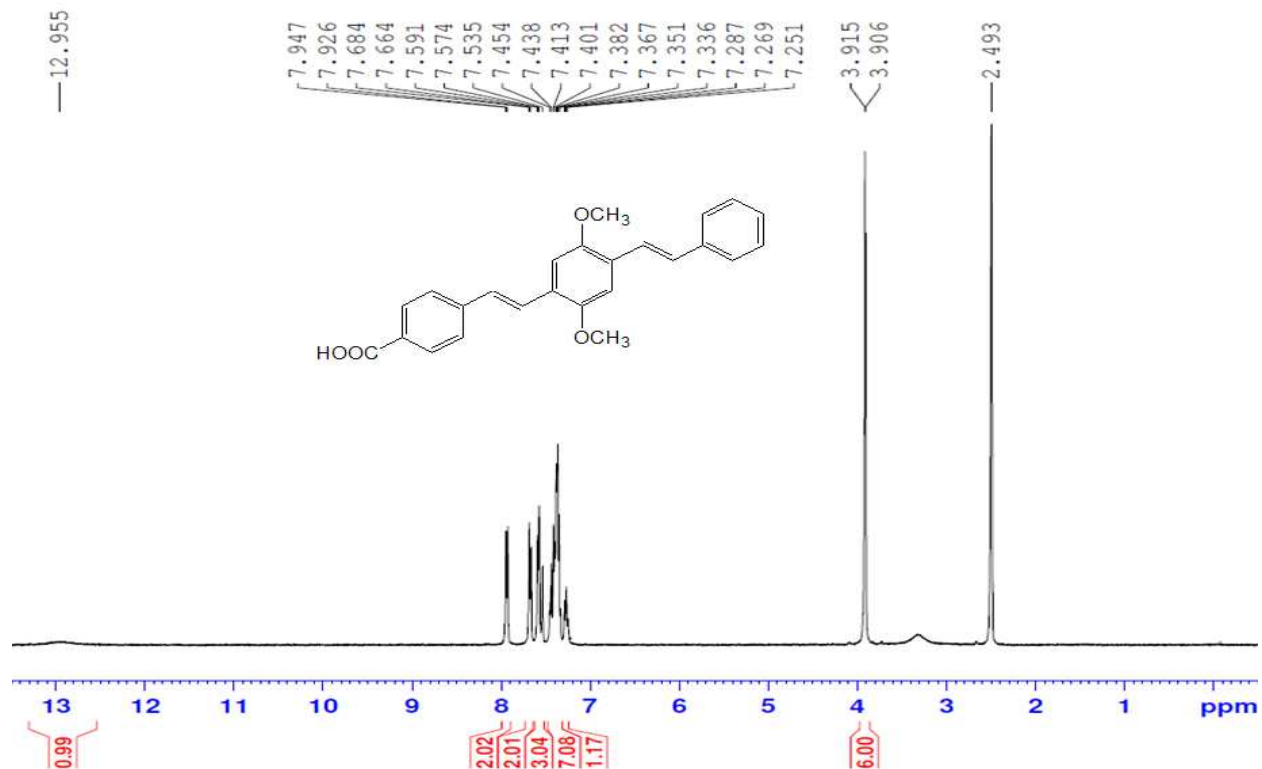

<sup>1</sup>H-NMR of COOH\_PPVO

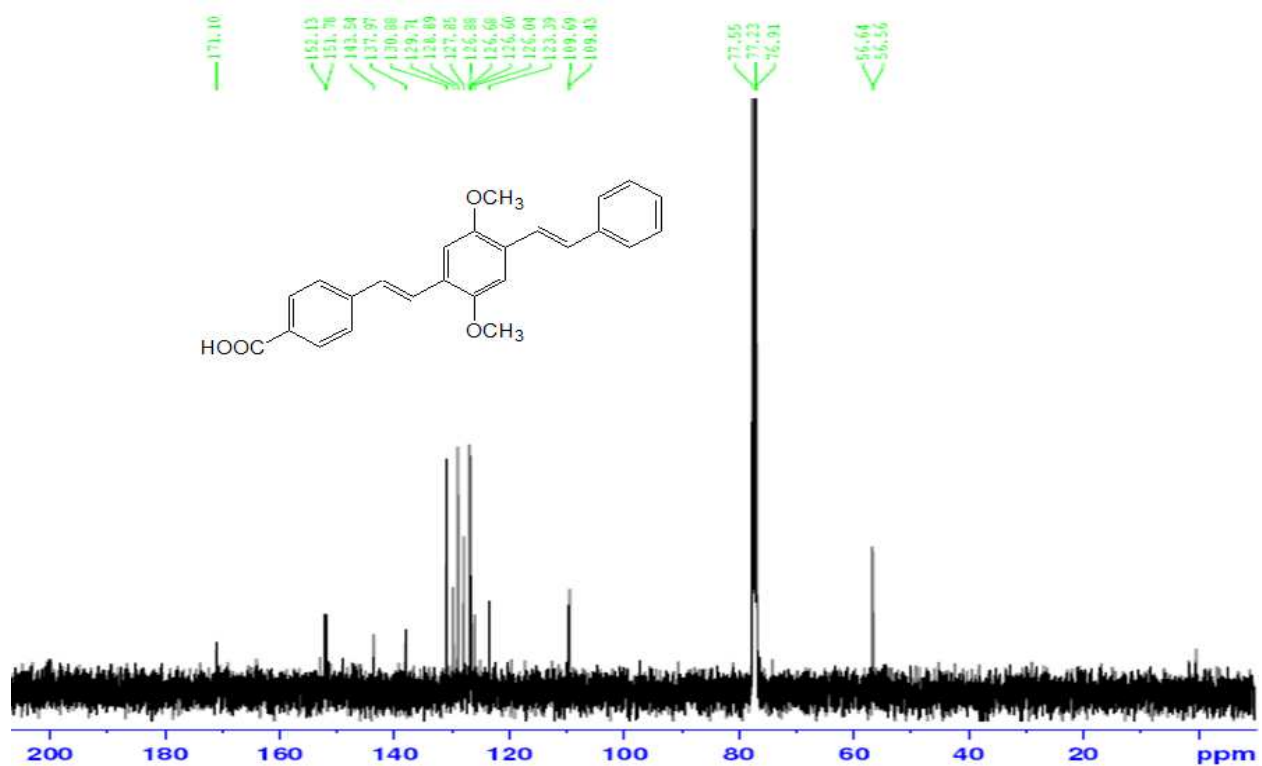

<sup>13</sup>C-NMR of COOH\_PPVO

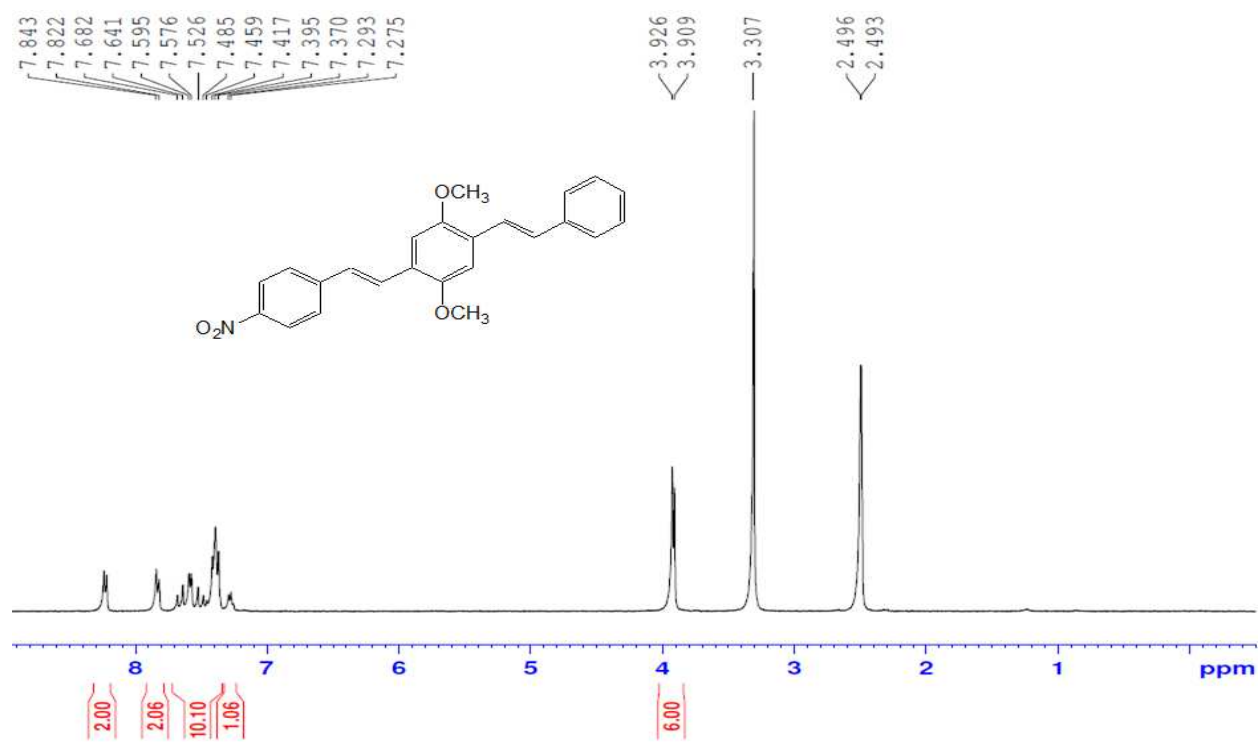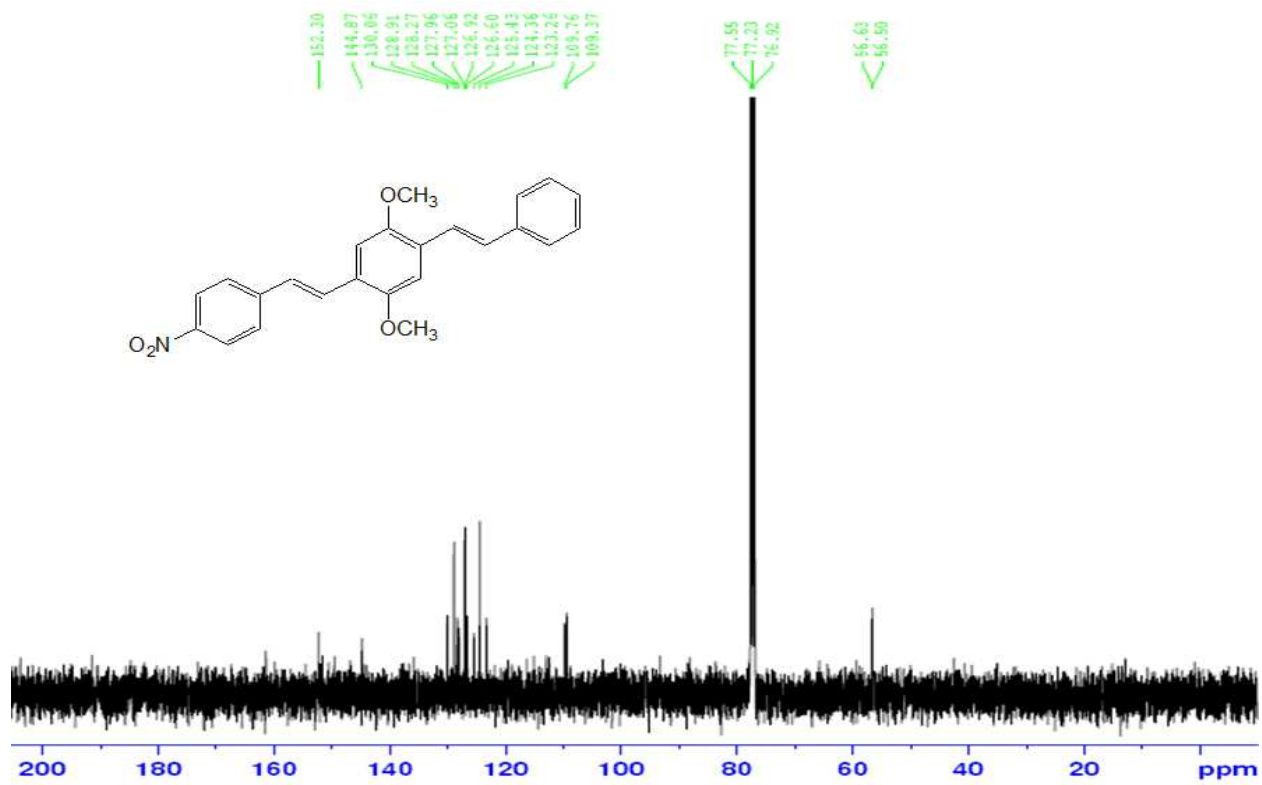



## 2. Conformational analysis

Molecular dynamics (MD) simulations with TINKER [J. W. Ponder, TINKER 6.0, <http://dasher.wustl.edu/tinker/>] using the MM3 force field [N. L. Allinger et al, J. Comput. Chem. 11, 868 (1990)] were carried out to discover alternative conformations. For most of the molecules at room temperature within 100 ps of the simulation time, a 360-degree rotation of the benzene rings and the interconnecting vinyl groups is observed. A few conformations with energies spread over 0.1 eV, were obtained by optimizing the MD snapshots. A conformation with an inverted vinyl group (Fig. 5S) was studied by ab-initio methods. The calculated absorption spectrum differs insignificantly (less than 10 nm) from that of the ground state conformation. Consequently, only the lowest energy conformation is used for further investigation.

|                               |      | H_PPVO | CH <sub>3</sub> _PPVO | Br_PPVO | NH <sub>2</sub> _PPVO | COOH_PPVO | NO <sub>2</sub> _PPVO |
|-------------------------------|------|--------|-----------------------|---------|-----------------------|-----------|-----------------------|
| Solution (Toluene)            | UV   | 392    | 393                   | 395     | 401                   | 402       | 425                   |
|                               | PL   | 440    | 440                   | 467     | 461                   | 461       | 522                   |
| Stock Shift In solution       |      | 48     | 47                    | 72      | 60                    | 59        | 97                    |
| Solution (CHCl <sub>3</sub> ) | UV   | 389    | 389                   | 392     | 397                   | 400       | 426                   |
|                               | PL   | 446    | 446                   | 454     | 482                   | 482       | 627                   |
| Stock Shift In solution       |      | 57     | 57                    | 62      | 85                    | 82        | 201                   |
| Film                          | UV   | 406    | 401                   | 391     | 412                   | 413       | 445                   |
|                               | PL   | 494    | 480                   | 496     | 516                   | 514       | 596                   |
| Stock Shift in film           |      | 88     | 79                    | 105     | 104                   | 101       | 151                   |
| PL (Film – Solution(Toluene)) |      | 54     | 40                    | 29      | 55                    | 53        | 74                    |
| Film                          | HOMO | 5.39   | 5.36                  | 5.18    | 4.98                  | 5.20      | 5.51                  |
|                               | LUMO | 2.66   | 2.62                  | 2.78    | 2.37                  | 2.57      | 3.20                  |
| Q. Y.                         |      | 0.89   | 0.90                  | 0.89    | 0.29                  | 0.79      | 0.01                  |

Table S1. List of  $\lambda_{max}$ , for UV-Vis absorption, photoluminescence, Stokes shift and quantum yield of all six PPVOs. These results reveal a strong correlation between the molecular dipole and optical properties. Such correlations are interpreted as due to strong molecular solvent interactions and the formation of various aggregates as manifested by the light scattering

| Media              | abbr | $\epsilon_{static}$ | $\epsilon_{optical}$ |
|--------------------|------|---------------------|----------------------|
| Toluene            | tol  | 2.37                | 2.24                 |
| Chloroform         | clf  | 4.71                | 2.09                 |
| Chlorobenzene      | clb  | 5.70                | 2.32                 |
| Tetrahydrofuran    | thf  | 7.43                | 1.97                 |
| Acetonitrile       | an   | 35.69               | 1.81                 |
| Dimethyl sulfoxide | dms  | 46.83               | 2.01                 |

Table S2: List of all the media used in the theoretical calculations, their abbreviations and values of static and optical dielectric constants.

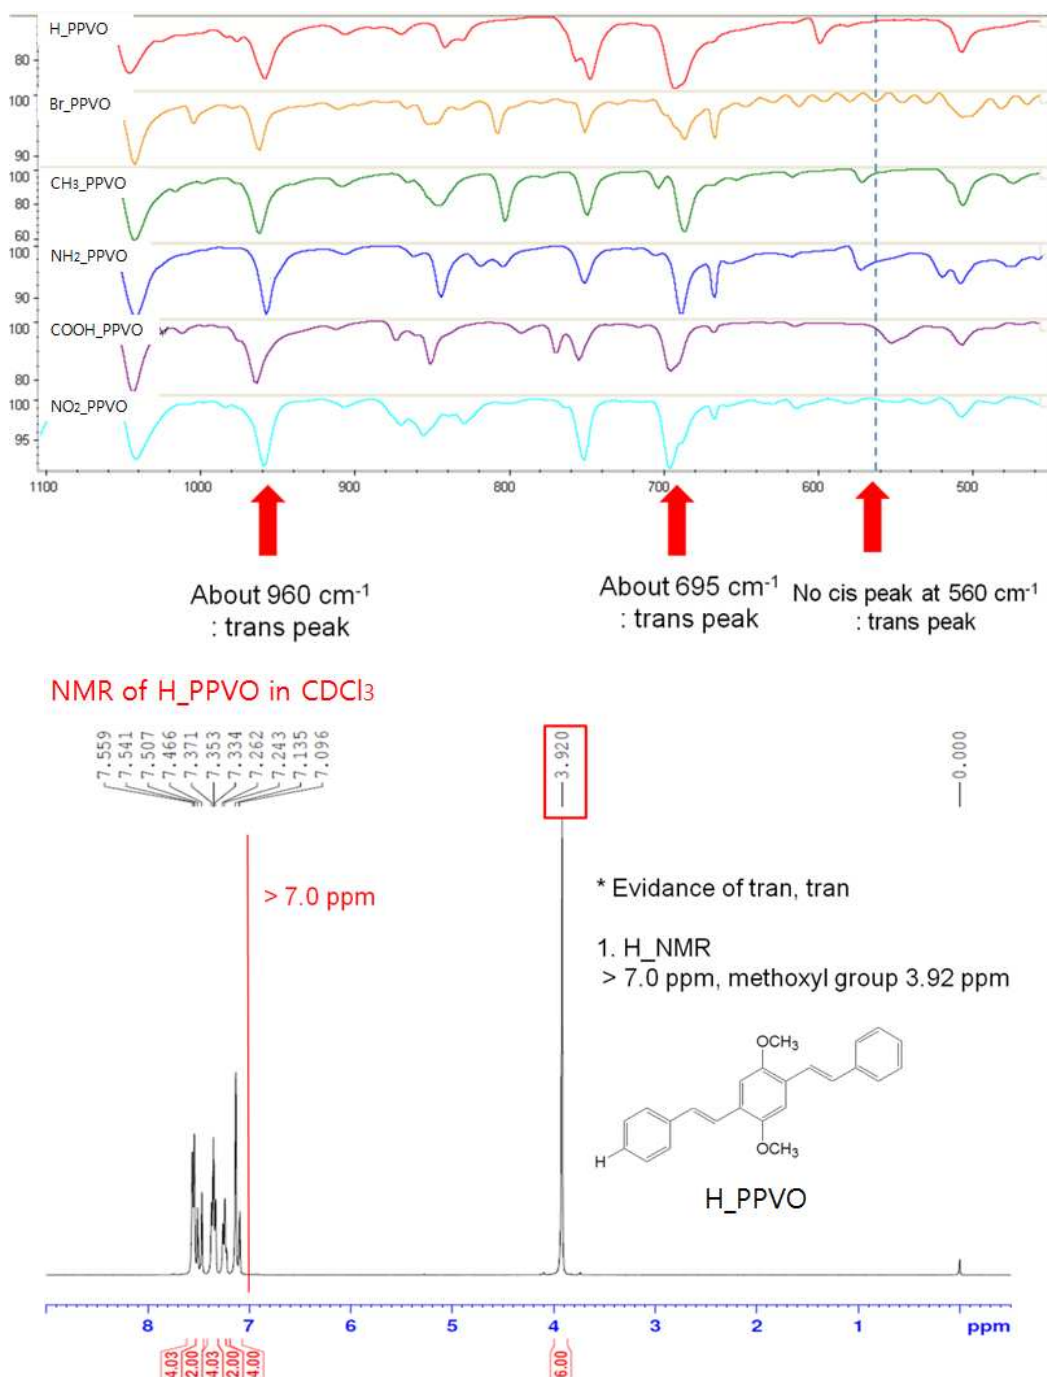

Figure S1. (Top) FT-IR spectra of all six PPVOs. Two peaks at  $960\text{ cm}^{-1}$  and  $695\text{ cm}^{-1}$  reveal only *trans-trans* conformation in all six PPVOs. Lacking the peak at  $\sim 560\text{ cm}^{-1}$  suggest that no *cis-trans*, and *cis-cis* conformations. (Bottom) NMR spectrum of H-PPVO shows that all aromatic protons have a chemical shift above  $7.0\text{ ppm}$  further validates the fact that only *trans-trans* conformation in the H PPVO. In fact, the chemical shifts of all six PPVOs have aromatic proton greater than  $7.0\text{ ppm}$  (see experimental section).

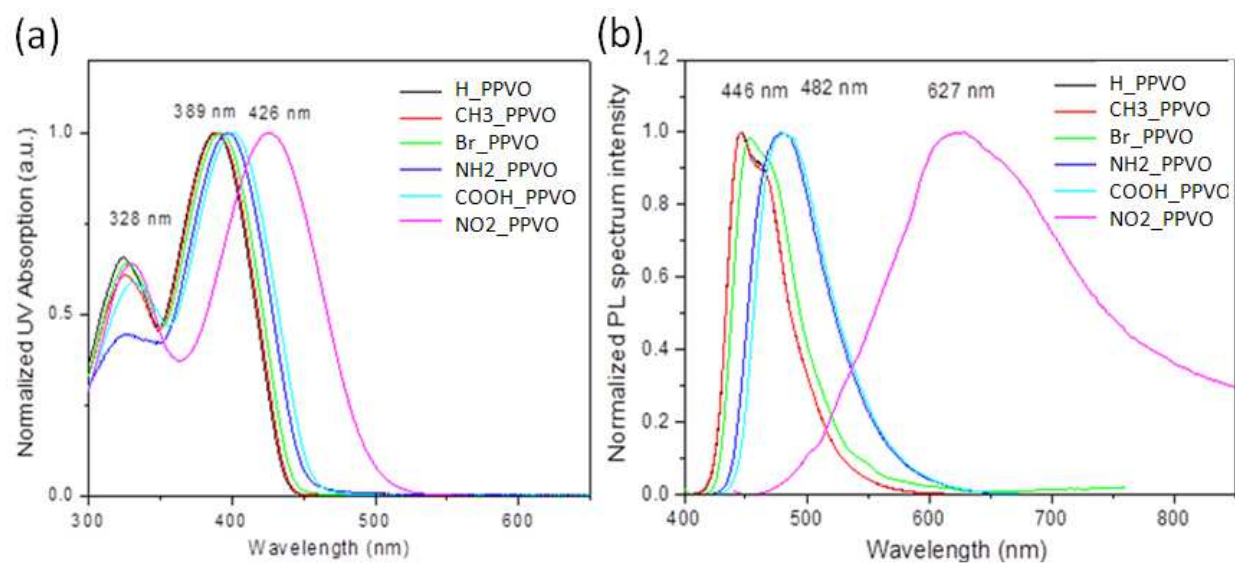

Figure S2. UV-Vis spectra (a) and photoluminescence spectra (b) of six PPVOs in chloroform solution. Both spectra show end group-dependent optical properties that are attributed to the molecular dipole and formation of aggregates states in PPVO solutions.

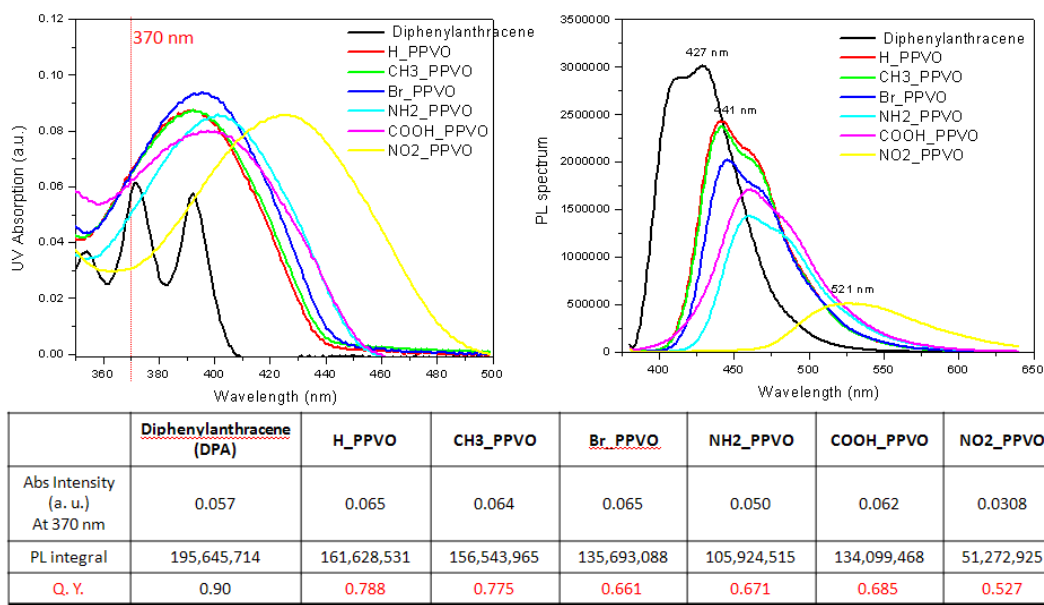

$$Q.Y_{F(A)} = Q.Y_{F(ref)} \times (PL_A / UV_A) \times (UV_{ref} / PL_{ref}) \times (\eta_A / \eta_{ref})^2$$

( $\eta$  : refractive index,  $\eta$  of Ethanol : 1.3614,  $\eta$  of Toluene : 1.4969)

Solvent : Ethanol (DPA), Toluene (PPVO derivatives)

Figure S3, Determination of quantum yields of six PPVOs in toluene solution. PL spectra were recorded by excitation wavelength of 370 nm, which is different from Figure 1 in which excitation wavelength is the wavelength of max of absorbance spectra.

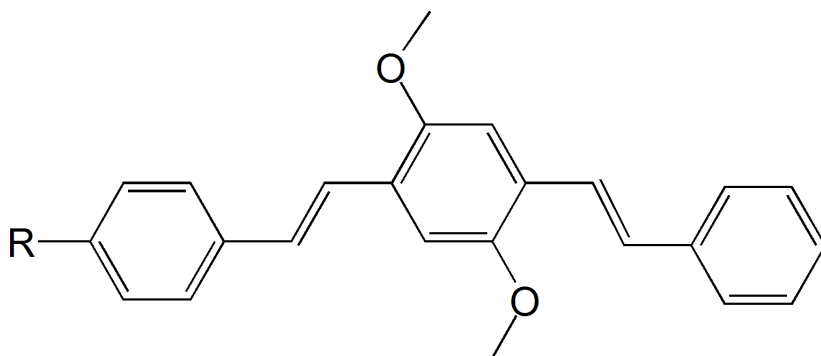

Figure S4. Alternative conformation accessible at 300K.

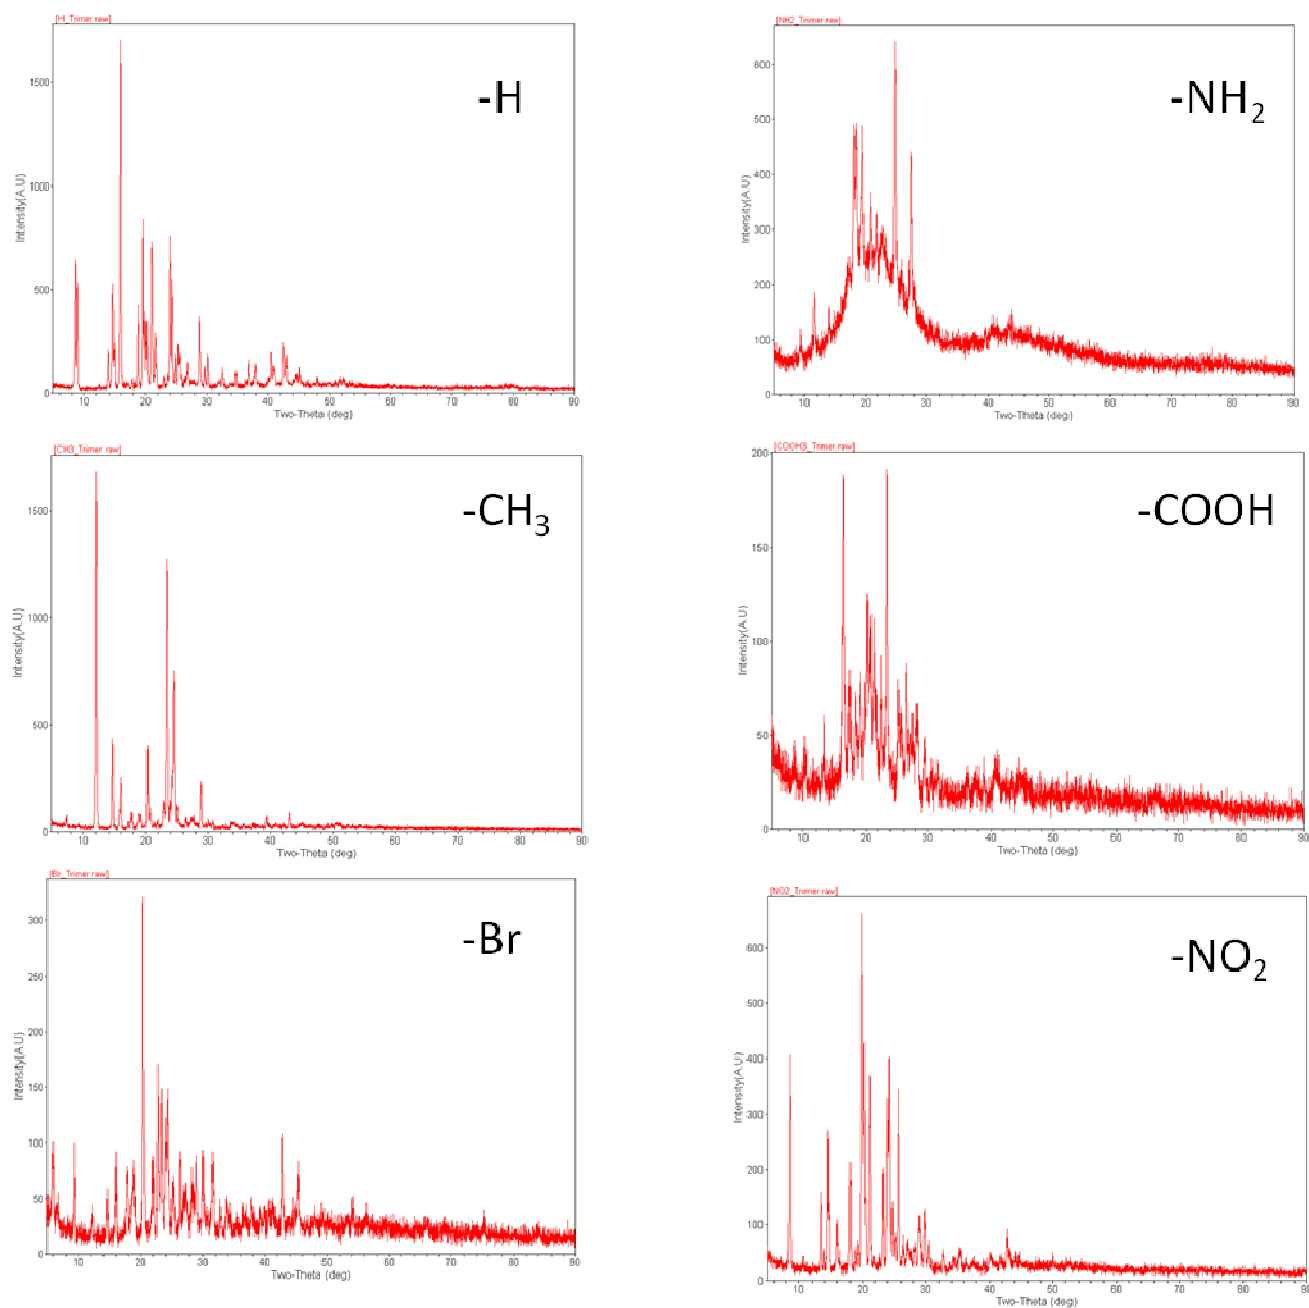

Figure S5. XRD spectra of six oligomer samples. Of all oligomer samples, we find high crystalline nature of the H-, Br- and NO<sub>2</sub>- oligomer.

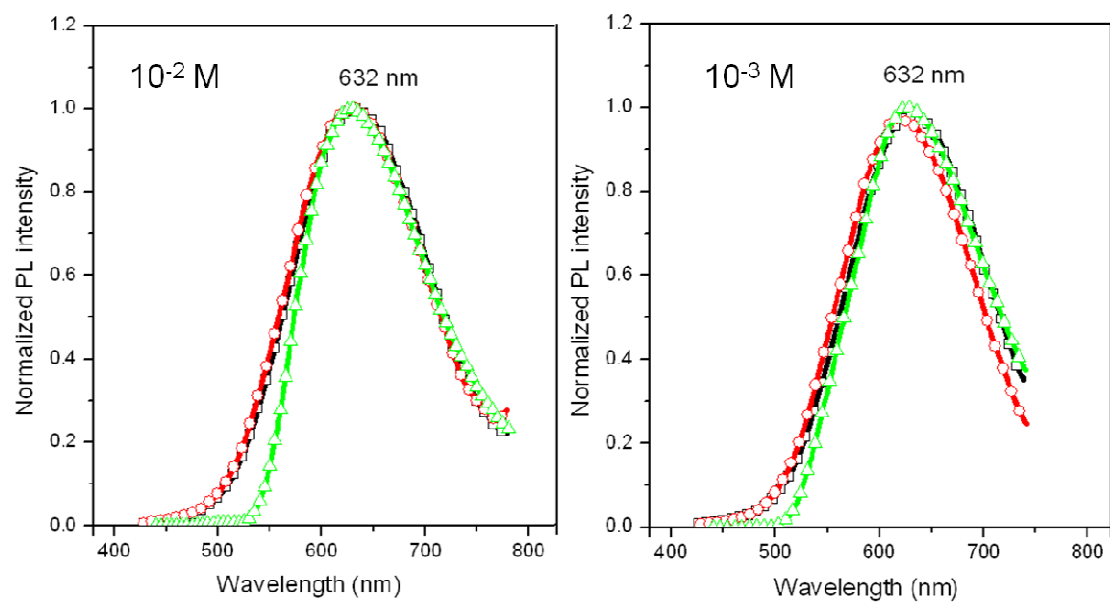

Figure S6. PL spectra of front face geometry using laser beam focus on the front of the cuvette, ( $\blacksquare$ ) and 90° angle relative to the excitation beam ( $\bullet$ ). PL spectrum of  $\text{NO}_2\text{-OPPV}$  in  $\text{CHCl}_3$  solution ( $\blacktriangle$ ) under normal PL setting.
